# Supplementary material for: Exposure to bloom-like concentrations of two marine Synechococcus cyanobacteria (strains CC9311 and CC9902) differentially alters fish behaviour
Source: PubMed Central journal article supplement (PMC4732467; doi:10.1093/conphys/cou020), 2014-06-05

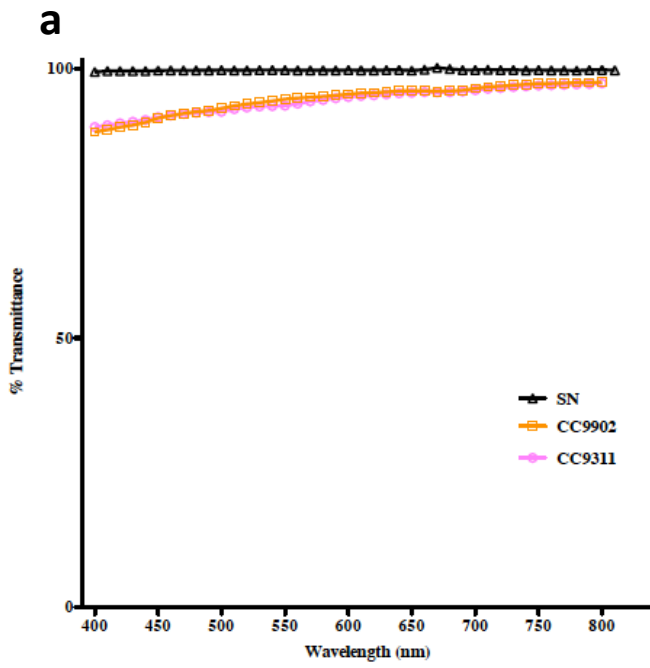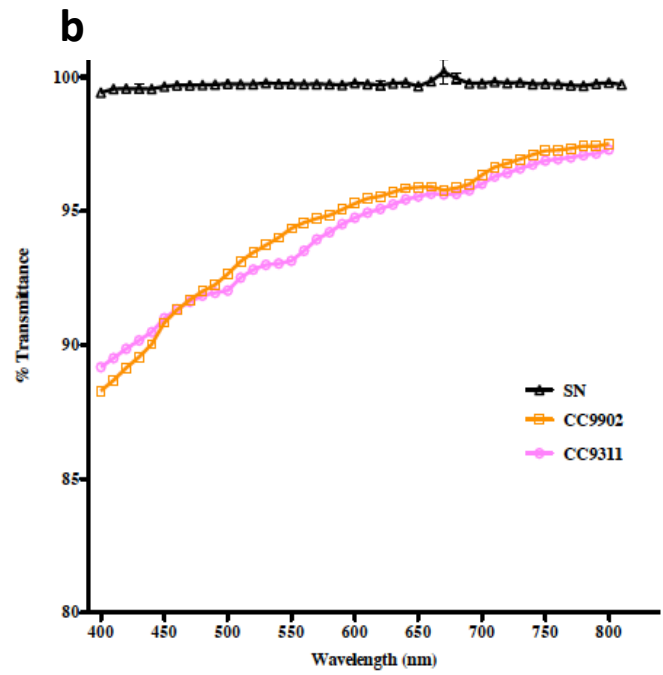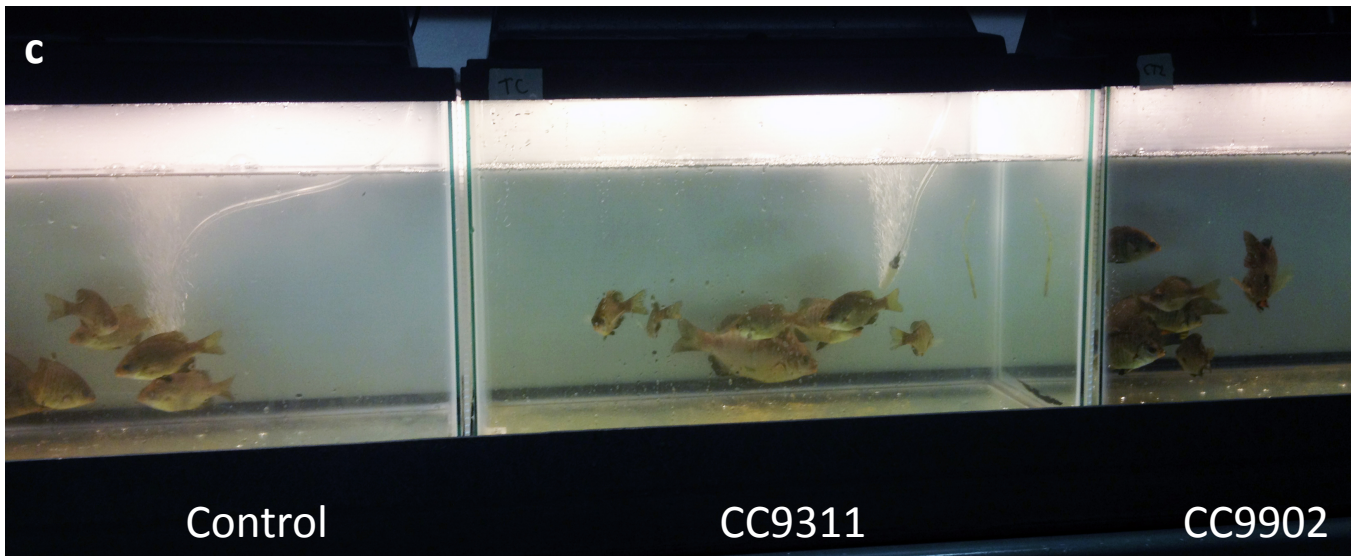

Supplement: supp_cou020_cou020supp_fig1.pdf [file supp_cou020_cou020supp_fig1.pdf]
